# Supplementary material
Source: PubMed Central journal article supplement (PMC5257294)

## Distribution of lymph nodes harvested for patients with LAD (n=32)

Number of patients

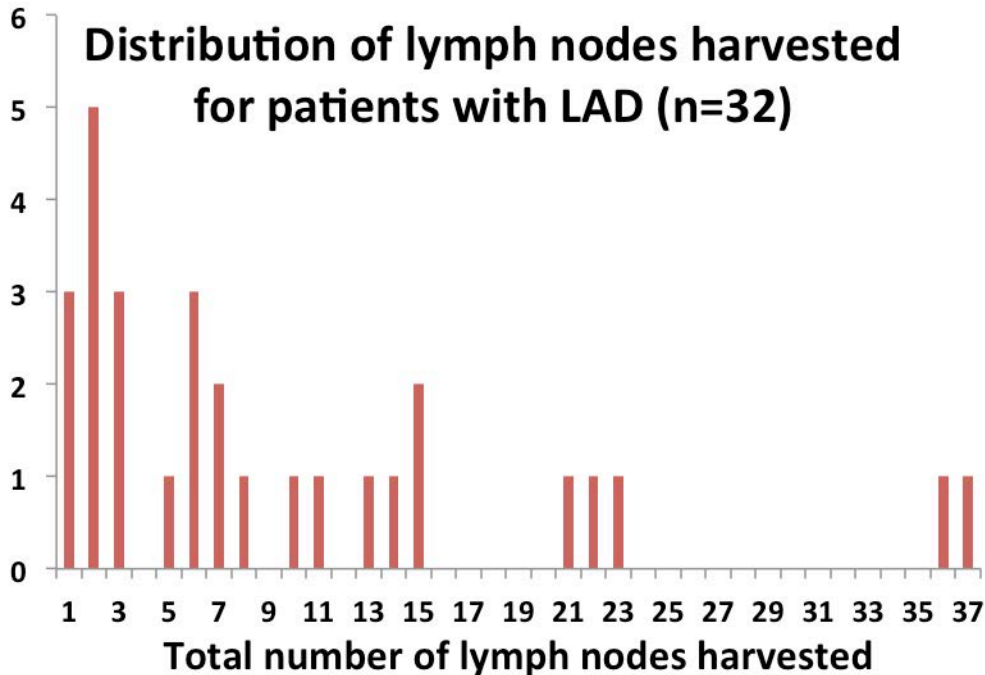

Supplement: NIHMS842651-supplement-Figure_S1.pdf [file NIHMS842651-supplement-Figure_S1.pdf]
